# Supplementary material for: Thermostable designed ankyrin repeat proteins (DARPins) as building blocks for innovative drugs
Source: PubMed Central journal article supplement (PMC8683736; doi:10.1016/j.jbc.2021.101403), 2021-11-15
Supplement: mmc1.pdf [file mmc1.pdf]

## Supplementary Tables

**Table S1.** Protein sequences used in this study.

| Name      | Sequence                                                                                                                                                   |
|-----------|------------------------------------------------------------------------------------------------------------------------------------------------------------|
| N1C_v01   | GSDLGKKLLE AARAGQ <b>D</b> DEV RELLKAGADV NAKDKDGYTP LHAAAREGHL EIVEVLLKAG<br>ADVNAQDKFG KTAFDISIDN GNEDLAEILQ KLN                                         |
| N1C_v02   | GSDAGKKLLE AARAGQ <b>D</b> DEV RELLKAGADV NAKDKDGYTP LHAAAREGHL EIVEVLLKAG<br>ADVNAQDKFG KTAFDISIDN GNEDLAEILQ KLN                                         |
| N1C_v03   | GSDLAKKLLLE AARAGQ <b>D</b> DEV RELLKAGADV NAKDKDGYTP LHAAAREGHL EIVEVLLKAG<br>ADVNAQDKFG KTAFDISIDN GNEDLAEILQ KLN                                        |
| N1C_v04   | GSDLGKKLLE AARAGQ <b>A</b> DEV RELLKAGADV NAKDKDGYTP LHAAAREGHL EIVEVLLKAG<br>ADVNAQDKFG KTAFDISIDN GNEDLAEILQ KLN                                         |
| N1C_v05   | GSDLGKKLLE AARAGQ <b>L</b> DEV RELLKAGADV NAKDKDGYTP LHAAAREGHL EIVEVLLKAG<br>ADVNAQDKFG KTAFDISIDN GNEDLAEILQ KLN                                         |
| N1C_v06   | GSDLGKKLLE AARAGQ <b>V</b> DEV RELLKAGADV NAKDKDGYTP LHAAAREGHL EIVEVLLKAG<br>ADVNAQDKFG KTAFDISIDN GNEDLAEILQ KLN                                         |
| N1C_v07   | GSDLGKKLLE AARAGQ <b>M</b> DEV RELLKAGADV NAKDKDGYTP LHAAAREGHL EIVEVLLKAG<br>ADVNAQDKFG KTAFDISIDN GNEDLAEILQ KLN                                         |
| N1C_v08   | GSDLGKKLLE AARAGQ <b>I</b> DEV RELLKAGADV NAKDKDGYTP LHAAAREGHL EIVEVLLKAG<br>ADVNAQDKFG KTAFDISIDN GNEDLAEILQ KLN                                         |
| N1C_v09   | GSDLGKKLLE AARAGQ <b>T</b> DEV RELLKAGADV NAKDKDGYTP LHAAAREGHL EIVEVLLKAG<br>ADVNAQDKFG KTAFDISIDN GNEDLAEILQ KLN                                         |
| N1C_v10   | GSDLGKKLLE AARAGQ <b>S</b> DEV RELLKAGADV NAKDKDGYTP LHAAAREGHL EIVEVLLKAG<br>ADVNAQDKFG KTAFDISIDN GNEDLAEILQ KLN                                         |
| N1C_v11   | GSDLGKKLLE AARAGQ <b>N</b> DEV RELLKAGADV NAKDKDGYTP LHAAAREGHL EIVEVLLKAG<br>ADVNAQDKFG KTAFDISIDN GNEDLAEILQ KLN                                         |
| N1C_v12   | GSDLGKKLLE AARAGQ <b>Q</b> DEV RELLKAGADV NAKDKDGYTP LHAAAREGHL EIVEVLLKAG<br>ADVNAQDKFG KTAFDISIDN GNEDLAEILQ KLN                                         |
| N1C_v13   | GSDLGKKLLE AARAGQ <b>K</b> DEV RELLKAGADV NAKDKDGYTP LHAAAREGHL EIVEVLLKAG<br>ADVNAQDKFG KTAFDISIDN GNEDLAEILQ KLN                                         |
| N1C_v14   | GSDLGKKLLE AARAGQ <b>R</b> DEV RELLKAGADV NAKDKDGYTP LHAAAREGHL EIVEVLLKAG<br>ADVNAQDKFG KTAFDISIDN GNEDLAEILQ KLN                                         |
| N1C_v15   | GSDLGKKLLE AARAGQ <b>E</b> DEV RELLKAGADV NAKDKDGYTP LHAAAREGHL EIVEVLLKAG<br>ADVNAQDKFG KTAFDISIDN GNEDLAEILQ KLN                                         |
| N1C_v16   | GSDLGKKLLE AARAGQ <b>D</b> DEV RILMANGADV NAKDKDGYTP LHAAAREGHL EIVEVLLKAG<br>ADVNAQDKFG KTAFDISIDN GNEDLAEILQ KLN                                         |
| N1C_v17   | GSDLGKKLLE AARAGQ <b>L</b> DEV RILMANGADV NAKDKDGYTP LHAAAREGHL EIVEVLLKAG<br>ADVNAQDKFG KTAFDISIDN GNEDLAEILQ KLN                                         |
| N1C_v19   | DADLAKKLLA AAAAGQ <b>D</b> EAV EQLLKAGADV NAKDKDGYTP LHAAAREGHL EIVEVLLKAG<br>ADVNAQDKFG KTAFDISIDN GNEDLAEILQ KLN                                         |
| N1C_v20   | DADLAKKLLA AAAAGQ <b>L</b> EAV EQLLKAGADV NAKDKDGYTP LHAAAREGHL EIVEVLLKAG<br>ADVNAQDKFG KTAFDISIDN GNEDLAEILQ KLN                                         |
| N1C_v22   | GSDLGKKLLE AARAGQ <b>D</b> DEV RELLKAGADV NAKDKDGYTP LHAAAREGHL EIVEVLLKAG<br>ADVNAQDKFG KTPFDLAIDN GNEDIAEVLQ KAA                                         |
| N1C_v23   | GSDLGKKLLE AARAGQ <b>L</b> DEV RELLKAGADV NAKDKDGYTP LHAAAREGHL EIVEVLLKAG<br>ADVNAQDKFG KTPFDLAIDN GNEDIAEVLQ KAA                                         |
| N1C_v25   | GSDLGKKLLE AARAGQ <b>D</b> DEV RILMANGADV NAKDKDGYTP LHAAAREGHL EIVEVLLKAG<br>ADVNAQDKFG KTPFDLAIDN GNEDIAEVLQ KAA                                         |
| aHER2_v01 | GSDLGKKLLE AARAGQ <b>D</b> DEV RILMANGADV NAKDEYGLTP LYLATAHGHL EIVEVLLKNG<br>ADVNAVDAIG FTPLHLAAF I GHLEIAEVLV KHGADVNAQD KFGKTAFDIS IGNGNEDLAE<br>ILQKLN |
| aHER2_v02 | GSDLGKKLLE AARAGQ <b>L</b> DEV RILMANGADV NAKDEYGLTP LYLATAHGHL EIVEVLLKNG<br>ADVNAVDAIG FTPLHLAAF I GHLEIAEVLV KHGADVNAQD KFGKTAFDIS IGNGNEDLAE<br>ILQKLN |

|           |            |                     |            |            |            |            |
|-----------|------------|---------------------|------------|------------|------------|------------|
| aVEGF_v01 | GSDLDKKLE  | AARAGQ <b>D</b> DEV | RILMANGADV | NARDSTGWTP | LHLAAPWGHP | EIVEVLLKNG |
|           | ADVNAADFQ  | WTPLHLAAAV          | GHLEIVEVLL | KYGADVNAQD | KFGKTAFDIS | IDNGNEDLAE |
|           | ILQKAA     |                     |            |            |            |            |
| aVEGF_v02 | GSDLDKKLE  | AARAGQ <b>L</b> DEV | RILMANGADV | NARDSTGWTP | LHLAAPWGHP | EIVEVLLKNG |
|           | ADVNAADFQ  | WTPLHLAAAV          | GHLEIVEVLL | KYGADVNAQD | KFGKTAFDIS | IDNGNEDLAE |
|           | ILQKAA     |                     |            |            |            |            |
| aHSA_v01  | GSDLGKKLE  | AARAGQ <b>D</b> DEV | RELLKAGADV | NAKDYFSHTP | LHLAARNGHL | KIVEVLLKAG |
|           | ADVNAKDFAG | KTPLHLAANE          | GHLEIVEVLL | KAGADVNAQD | IFGKTPADIA | ADAGHEDIAE |
|           | VLQKAA     |                     |            |            |            |            |
| aHSA_v02  | GSDLGKKLE  | AARAGQ <b>L</b> DEV | RELLKAGADV | NAKDYFSHTP | LHLAARNGHL | KIVEVLLKAG |
|           | ADVNAKDFAG | KTPLHLAANE          | GHLEIVEVLL | KAGADVNAQD | IFGKTPADIA | ADAGHEDIAE |
|           | VLQKAA     |                     |            |            |            |            |

---
